# Supplementary material for: Time-dependent hydride correction for accurate 240 Pu/ 239 Pu isotopic ratio measurements in µm-sized Pu-bearing particles using large geometry-secondary ion mass spectrometry
Source: Royal Society of Chemistry journal article supplement (doi:10.1039/d5ja00190k), 2025-11-17
Supplement: d5ja00190k2.xlsx [file d5ja00190k2.xlsx]

## Sheet: Figure 1
			Part 1		Part 2		Part 3		Part 4		Part 5		Part 6		Part 7		Part 8		Part 9		Part 10		Part 11		Part 12		Part 13
		Cycle	Timing	238UH/238U	Timing	238UH/238U	Timing	Part 3	Timing	238UH/238U	Timing	238UH/238U	Timing	238UH/238U	Timing	238UH/238U	Timing	238UH/238U	Timing	238UH/238U	Timing	238UH/238U	Timing	238UH/238U	Timing	238UH/238U	Timing	238UH/238U		Mean timing	Mean 238UH/U	SD (k=1)	RSD
		1	15.918	0.003714	15.582	0.00409254	15.326	0.00325203	16.313	0.00473464	15.368	0.0034477	15.472	0.00433818	15.33	0.0037839	15.733	0.00361184	15.488	0.00282659	15.661	0.00289452	15.394	0.00295352	16.317	0.00328295	15.355	0.00322789		15.6352	0.00355079	0.000576445	0.162343
		2	24.079	0.00320507	23.825	0.00313587	23.466	0.00244016	24.393	0.00361502	23.511	0.00285964	23.599	0.00335991	23.409	0.00308238	23.888	0.00280459	23.624	0.00225715	23.769	0.0023194	23.529	0.00248591	24.485	0.00262979	23.558	0.00262301		23.7796	0.00283215	0.00042216	0.14906
		3	32.284	0.00239431	31.997	0.00268384	31.624	0.00219261	32.514	0.00306982	31.581	0.0025796	31.698	0.00300361	31.505	0.00256916	31.986	0.00262856	31.777	0.00214637	31.822	0.00196699	31.631	0.00231248	32.626	0.00223051	31.683	0.00229992		31.9022	0.00246752	0.000327705	0.132807
		4	40.421	0.00229825	40.051	0.00245261	39.712	0.00199633	40.773	0.00274955	39.684	0.00230023	39.949	0.00258766	39.578	0.00249872	40.148	0.00240494	39.941	0.00180111	39.915	0.00174886	39.797	0.00210745	40.774	0.00204606	39.812	0.00205363		40.0427	0.00223426	0.00030408	0.136099
		5	48.585	0.0020586	48.132	0.00244586	47.876	0.00179902	48.877	0.0024954	47.745	0.00232002	48.092	0.00245044	47.665	0.00220244	48.232	0.00207318	48.076	0.00181605	47.985	0.00155332	47.935	0.00184026	48.888	0.00184202	47.891	0.00179543		48.1522	0.00205323	0.000306665	0.149357
		6	56.794	0.00181441	56.283	0.0021515	56.044	0.00167713	56.972	0.00221124	55.893	0.00211601	56.252	0.00193028	55.739	0.00207874	56.392	0.00196088	56.245	0.00162135	56.173	0.001457	56.087	0.0017696	57.089	0.00170208	55.979	0.00174998		56.3032	0.00186463	0.000230337	0.123529
		7	64.884	0.0017083	64.396	0.00205766	64.137	0.00157133	65.042	0.00199559	63.999	0.00198867	64.41	0.00203201	63.809	0.00199837	64.467	0.00184388	64.35	0.00165387	64.329	0.00132915	64.178	0.00159386	65.301	0.00165788	64.043	0.00157662		64.4112	0.00176978	0.000230907	0.130472
		8	72.986	0.00160847	72.446	0.00181206	72.291	0.00150951	73.206	0.00188859	72.073	0.00179845	72.507	0.00186164	71.886	0.00181362	72.542	0.00179975	72.474	0.00157466	72.477	0.00132199	72.342	0.0015065	73.44	0.0016239	72.27	0.00152748		72.5338	0.00166512	0.000174941	0.105062
		9	81.121	0.00149676	80.63	0.00171793	80.348	0.00140414	81.29	0.00176541	80.129	0.0017485	80.58	0.00173655	79.976	0.00168093	80.622	0.00171882	80.572	0.00137817	80.566	0.0012464	80.496	0.00138235	81.598	0.00152455	80.391	0.00136135		80.6399	0.00155091	0.000183619	0.118394
		10	89.223	0.00130018	88.685	0.00179733	88.448	0.00134812	89.42	0.00167998	88.301	0.00160468	88.719	0.0017586	88.076	0.00166428	88.72	0.00161275	88.718	0.0013999	88.658	0.00123225	88.574	0.00138176	89.66	0.0014355	88.453	0.00136088		88.7427	0.00150586	0.000187101	0.124248
		11	97.357	0.00130488	96.794	0.00162545	96.507	0.001207	97.54	0.00167998	96.378	0.00154639	96.877	0.00161538	96.237	0.00161327	96.797	0.00160654	96.814	0.00127263	96.819	0.00112408	96.72	0.00130294	97.84	0.00140852	96.618	0.00127106		96.8691	0.00142909	0.000191256	0.133831
		12	105.51	0.00120636	104.866	0.00160919	104.581	0.00125756	105.631	0.00163648	104.526	0.00142759	104.962	0.0016443	104.397	0.00151775	104.952	0.00152365	104.974	0.00125165	104.94	0.00112419	104.799	0.00122756	105.986	0.00136813	104.681	0.00123954		104.985	0.00138723	0.000182464	0.131532
		13	113.687	0.00114472	112.933	0.00152592	112.688	0.00119196	113.786	0.00152299	112.722	0.0013347	113.139	0.00149844	112.479	0.00141962	113.1	0.00149816	113.037	0.00113655	113.038	0.00111025	112.892	0.00119325	114.323	0.0013318	112.874	0.00119055		113.131	0.0013153	0.00016196	0.123135
		14	121.791	0.00111398	121.108	0.00151033	120.743	0.00113277	121.839	0.00145819	120.801	0.00124583	121.217	0.00140141	120.524	0.00139578	121.189	0.0014039	121.214	0.00109151	121.106	0.00108467	120.99	0.00115613	122.449	0.0012097	120.938	0.00116155		121.224	0.0012589	0.000153003	0.121537
		15	129.923	0.00117535	129.245	0.00143415	128.839	0.00122285	129.946	0.00140036	128.867	0.00124186	129.364	0.00133117	128.721	0.00139241	129.28	0.00138657	129.373	0.000918332	129.208	0.00102577	129.153	0.00109692	130.624	0.00115372	129.008	0.00108438		129.35	0.0012203	0.000162624	0.133266
		16	138.093	0.00105021	137.342	0.00146646	136.903	0.00122883	138.005	0.00133144	136.964	0.00120992	137.459	0.00123053	136.849	0.00134391	137.438	0.00132575	137.44	0.000750673	137.278	0.000938791	137.287	0.00100291	138.726	0.00114402	137.194	0.0010559		137.46	0.00115995	0.000196026	0.168995
		17	146.151	0.00102262	145.416	0.00124281	144.99	0.00119536	146.076	0.00128823	145.118	0.0011338	145.526	0.00137241	144.937	0.00139619	145.58	0.00131474	145.517	0.000820322	145.345	0.000925194	145.375	0.000933275	146.875	0.00112084	145.25	0.000978116		145.55	0.00113415	0.000186369	0.164325
		18	154.253	0.00104062	153.585	0.00133844	153.096	0.00118291	154.188	0.00130115	153.183	0.0010271	153.707	0.00123767	153.021	0.00127853	153.664	0.00125497	153.603	0.00074788	153.427	0.000913262	153.441	0.000970407	154.942	0.00113436	153.335	0.000965793		153.65	0.00110716	0.000178432	0.161161
		19	162.342	0.000984077	161.834	0.00131932	161.304	0.0011208	162.331	0.00121794	161.262	0.00109793	161.836	0.00110825	161.195	0.00126032	161.824	0.00122707	161.776	0.000642099	161.532	0.000898551	161.598	0.000920191	163.096	0.0010984	161.421	0.000964293		161.796	0.0010661	0.000183455	0.172081
		20	170.504	0.00099545	170.073	0.00133859	169.39	0.00118039	170.505	0.00119905	169.344	0.00103697	169.948	0.00110946	169.356	0.00125819	169.98	0.00113367	169.87	0.000643155	169.599	0.000916679	169.684	0.000837103	171.221	0.00100041	169.573	0.00093986		169.927	0.00104531	0.000187628	0.179496
		21	178.651	0.00101305	178.156	0.00123043	177.471	0.00112539	178.565	0.00116533	177.508	0.000929869	178.096	0.00112518	177.484	0.00117653	178.179	0.00113454	178.029	0.000624688	177.74	0.000867714	177.839	0.000885245	179.362	0.00102736	177.65	0.000853308		178.056	0.0010122	0.000172733	0.17065
		22	186.823	0.0010073	186.284	0.00120387	185.557	0.00109878	186.652	0.00110858	185.602	0.000983336	186.21	0.0010828	185.65	0.0012703	186.416	0.00116528	186.151	0.000597437	185.836	0.000878859	186.123	0.000773234	187.503	0.000961403	185.822	0.00089163		186.202	0.00100175	0.000185298	0.184973
		23	194.868	0.000944542	194.458	0.00120842	193.622	0.00113065	194.737	0.00112608	193.676	0.00087662	194.341	0.00104765	193.759	0.00116574	194.544	0.00111157	194.343	0.00060438	194.011	0.000890006	194.36	0.00079132	195.595	0.000933492	193.889	0.000861344		194.323	0.000976293	0.000174497	0.178735
		24	202.976	0.000861186	202.548	0.00112784	201.721	0.00116123	202.798	0.00108809	201.841	0.000963616	202.414	0.00102913	201.904	0.00121401	202.691	0.0010685	202.487	0.000507606	202.141	0.000917953	202.478	0.000787058	203.67	0.000899925	202.041	0.000827386		202.439	0.000957963	0.000190043	0.198382
		25	211.038	0.000881184	210.612	0.00120903	209.928	0.00113254	210.87	0.00105115	209.917	0.000890556	210.507	0.000942048	210.056	0.00113157	210.797	0.0010981	210.551	0.000580573	210.235	0.000860503	210.564	0.000750626	211.76	0.000900353	210.205	0.000835154		210.542	0.000943337	0.000176351	0.186944
		26	219.125	0.000922345	218.715	0.0010171	218.032	0.00117669	219.061	0.0010555	218.006	0.000920021	218.634	0.000942456	218.152	0.00103106	218.958	0.00113314	218.723	0.000512733	218.333	0.000867127	218.744	0.000684572	219.896	0.000892442	218.317	0.000836035		218.669	0.000922402	0.000178832	0.193877
		27	227.221	0.000864479	226.863	0.00103031	226.136	0.00114086	227.2	0.000978495	226.129	0.000849381	226.739	0.000918666	226.236	0.00106051	227.019	0.0011327	226.805	0.000554961	226.48	0.000832205	226.886	0.000648934	227.964	0.000824791	226.44	0.000783525		226.778	0.000893832	0.000175748	0.196624
		28	235.276	0.000842391	234.952	0.000971871	234.279	0.00110548	235.291	0.000964367	234.25	0.00077211	234.851	0.00079899	234.375	0.00103369	235.092	0.000999545	234.961	0.00037487	234.618	0.000830674	234.975	0.000661053	236.045	0.000856188	234.519	0.000800572		234.883	0.000847062	0.000187578	0.221446
		29	243.374	0.000843616	243.085	0.000959877	242.351	0.00110327	243.436	0.000900145	242.37	0.000842342	243.022	0.000831276	242.465	0.000982995	243.245	0.00108151	243.041	0.000480517	242.702	0.00084865	243.123	0.000647583	244.131	0.000752299	242.598	0.000762554		242.996	0.000848972	0.000169592	0.199761
		30	251.466	0.000742543	251.184	0.000906098	250.447	0.00106373	251.589	0.00089412	250.557	0.000737062	251.114	0.00077839	250.629	0.00100407	251.321	0.00107068	251.199	0.000412942	250.784	0.000875521	251.213	0.000602544	252.313	0.000786847	250.796	0.000710921		251.124	0.000814267	0.000185355	0.227635
		31	259.607	0.00084085	259.238	0.000910077	258.554	0.0010234	259.67	0.000863662	258.714	0.000790985	259.265	0.000809571	258.701	0.00104493	259.42	0.00102016	259.269	0.000442568	258.898	0.000820716	259.364	0.000587653	260.478	0.000782239	258.939	0.000742283		259.24	0.000821469	0.000170126	0.207099
		32	267.677	0.000850143	267.318	0.000934201	266.69	0.00105848	267.749	0.000843126	266.771	0.000749801	267.35	0.000688895	266.853	0.00105349	267.482	0.0010686	267.435	0.000508936	267.127	0.000802076	267.459	0.000556916	268.639	0.000708172	267.127	0.000723571		267.36	0.000811262	0.000181866	0.224176
		33	275.763	0.000780505	275.422	0.000905344	274.854	0.000985641	275.866	0.000833191	274.884	0.000767454	275.466	0.000708175	275.01	0.000957752	275.595	0.000964511	275.545	0.000361915	275.285	0.000896679	275.542	0.000526886	276.849	0.000702775	275.253	0.000701711		275.487	0.000776349	0.0001817	0.234045
		34	283.855	0.000743979	283.511	0.000863628	283.156	0.0010493	284.026	0.000795549	283.018	0.000779882	283.625	0.00064789	283.107	0.00101033	283.725	0.000951087	283.789	0.000389192	283.376	0.000791063	283.7	0.000521715	284.929	0.000734567	283.338	0.000697596		283.627	0.000767367	0.000184204	0.240047
		35	291.987	0.000725956	291.662	0.000772882	291.219	0.00105569	292.157	0.000709718	291.215	0.000687537	291.757	0.000652998	291.198	0.000951569	291.821	0.000911401	291.912	0.000395545	291.511	0.000830145	291.75	0.000483012	293.023	0.000683413	291.51	0.000679964		291.748	0.000733833	0.000179222	0.244228
		36	300.096	0.000749549	299.812	0.000753627	299.308	0.0010631	300.246	0.000787208	299.35	0.000695854	299.911	0.000586745	299.261	0.000942941	299.917	0.000939737	300.013	0.000394906	299.609	0.000799213	299.914	0.000465391	301.116	0.000682153	299.571	0.000639825		299.856	0.000730788	0.000187905	0.257126
		37	308.171	0.000741945	307.876	0.000703784	307.409	0.00105427	308.334	0.000747931	307.504	0.000701969	307.996	0.000638583	307.323	0.000951811	308.053	0.000832398	308.167	0.000353951	307.671	0.00081523	308.11	0.000450386	309.275	0.00066329	307.733	0.000667799		307.971	0.000717181	0.000184431	0.257161
		38	316.253	0.000773606	315.989	0.00075449	315.489	0.00104426	316.395	0.000651703	315.677	0.000627936	316.094	0.000636073	315.404	0.000907154	316.147	0.000902847	316.325	0.000330334	315.762	0.000771472	316.248	0.000470254	317.351	0.000674012	315.801	0.00063309		316.072	0.000705941	0.000187486	0.265583
		39	324.405	0.000650472	324.151	0.000689848	323.635	0.000951669	324.488	0.000703406	323.728	0.000648328	324.184	0.000610059	323.579	0.000960083	324.322	0.000901815	324.401	0.000394356	323.842	0.000831184	324.335	0.000445097	325.5	0.00066207	324.05	0.000580352		324.202	0.000694518	0.000177013	0.254872
		40	332.501	0.000712255	332.3	0.000707299	331.704	0.00105064	332.573	0.000697236	331.832	0.000687124	332.311	0.000625713	331.654	0.000871407	332.461	0.000923383	332.561	0.000347105	331.903	0.00078613	332.414	0.000450453	333.591	0.000635488	332.137	0.000584932		332.303	0.000698398	0.000187021	0.267786
		41	340.647	0.00070765	340.36	0.000688345	339.804	0.000960356	340.661	0.000736528	339.885	0.000630784	340.403	0.000608677	339.749	0.000853625	340.605	0.000882119	340.801	0.000319155	339.997	0.000751947	340.552	0.0004399	341.665	0.000632749	340.309	0.00059611		340.418	0.000677534	0.000174012	0.256831
		42	348.808	0.000666869	348.575	0.000633913	347.868	0.00102267	348.739	0.00062309	347.969	0.000605016	348.467	0.000587347	347.885	0.000841469	348.776	0.000923657	348.903	0.000431731	348.148	0.000765868	348.742	0.000406665	349.729	0.000613389	348.392	0.000577169		348.539	0.000669143	0.000177907	0.265873
		43	356.887	0.000647754	356.68	0.000689215	355.944	0.000990124	356.895	0.000646146	356.057	0.000577596	356.665	0.000594544	355.992	0.000827012	356.842	0.000933559	357.035	0.000311075	356.272	0.000758041	356.887	0.000374731	357.883	0.000594377	356.465	0.000562843		356.654	0.000654386	0.000193661	0.295943
		44	364.957	0.000683232	364.773	0.000701266	364.113	0.000965206	365.045	0.000615093	364.126	0.00058457	364.803	0.000623325	364.049	0.000766745	364.926	0.000875624	365.123	0.000310824	364.542	0.000726619	364.974	0.00038155	366.054	0.000600966	364.517	0.000577528		364.769	0.000647119	0.000176626	0.272941
		45	373.039	0.000667772	372.941	0.000624461	372.186	0.000923259	373.112	0.000608978	372.306	0.000579513	372.883	0.000587236	372.139	0.000837371	373.039	0.000869686	373.273	0.000352506	372.659	0.000726826	373.111	0.000374261	374.246	0.000613417	372.703	0.00059735		372.895	0.00064328	0.000169204	0.263033
		46	381.107	0.000619666	381.028	0.000618	380.264	0.000974527	381.187	0.000624803	380.418	0.000545244	381.035	0.00054451	380.234	0.000814084	381.185	0.000905016	381.433	0.000348293	380.816	0.000775283	381.198	0.000349727	382.365	0.000568506	380.784	0.000541402		381.004	0.000633005	0.000190071	0.300267
		47	389.264	0.000666771	389.099	0.000574382	388.366	0.000994982	389.27	0.000619504	388.63	0.000559389	389.319	0.000530876	388.37	0.000776265	389.331	0.000845068	389.513	0.000309023	388.96	0.000766865	389.354	0.000352926	390.453	0.000556249	388.852	0.000573649		389.137	0.000625073	0.000188647	0.301801
		48	397.361	0.000693242	397.178	0.00055607	396.414	0.0010798	397.429	0.000604173	396.703	0.000612517	397.439	0.000509781	396.45	0.000763478	397.407	0.000918328	397.694	0.000267448	397.133	0.000775452	397.521	0.000333316	398.545	0.000536086	397.018	0.000583554		397.253	0.000633326	0.000219775	0.347017
		49	405.549	0.00065914	405.264	0.000606089	404.496	0.0010354	405.551	0.000612263	404.792	0.000526919	405.525	0.000541533	404.523	0.000779243	405.595	0.000834792	405.832	0.000243484	405.254	0.000758975	405.61	0.000343528	406.631	0.000533598	405.081	0.000590645		405.362	0.000620431	0.000205446	0.331134
		50	413.689	0.000634646	413.511	0.000667384	412.587	0.00101059	413.679	0.000591641	412.879	0.000518324	413.609	0.000540644	412.715	0.000766674	413.852	0.000848754	413.933	0.000378959	413.44	0.00076021	413.7	0.000321284	414.793	0.00052202	413.191	0.000589227		413.506	0.00062695	0.000187796	0.299539
		51	421.746	0.000645317	421.635	0.000531288	420.769	0.00108911	421.848	0.000556459	421.017	0.000485111	421.683	0.000561844	420.764	0.000775693	421.993	0.000750859	422.007	0.000304097	421.553	0.000698818	421.867	0.000337405	422.951	0.000497984	421.327	0.000529058		421.628	0.000597158	0.000203675	0.341074
		52	429.826	0.000625918	429.749	0.000581824	428.897	0.000957954	430.023	0.000596609	429.087	0.000501297	429.774	0.000537381	428.954	0.000758438	430.062	0.000746728	430.069	0.000244579	429.674	0.000687334	430.017	0.000324158	431.017	0.000479874	429.485	0.000541761		429.741	0.000583374	0.000185676	0.31828
		53	437.994	0.000633788	437.88	0.000563509	436.977	0.00101168	438.164	0.000577134	437.29	0.000534729	437.931	0.000564323	437.106	0.000750261	438.198	0.000823846	438.232	0.000309711	437.849	0.000722946	438.184	0.000328682	439.087	0.000508171	437.583	0.000564369		437.883	0.000607165	0.000189896	0.312759
		54	446.102	0.000639027	445.952	0.000561045	445.084	0.000954924	446.343	0.000558184	445.404	0.000510362	446.011	0.000517726	445.174	0.000737027	446.31	0.000822355	446.32	0.000246393	445.982	0.000655141	446.317	0.00031934	447.195	0.000480739	445.636	0.000566649		445.987	0.000582224	0.000189706	0.325829
		55	454.232	0.000639957	454.14	0.000501013	453.22	0.000934376	454.477	0.000496224	453.511	0.000451256	454.094	0.000488999	453.244	0.000733184	454.376	0.000784478	454.403	0.000373994	454.155	0.000686661	454.424	0.000340239	455.334	0.000452479	453.755	0.000511274		454.105	0.00056878	0.000173977	0.305878
		56	462.388	0.000659576	462.284	0.000584718	461.321	0.000942224	462.639	0.00053507	461.599	0.000437447	462.181	0.000478119	461.326	0.000714592	462.52	0.000743406	462.48	0.000302716	462.217	0.000770454	462.557	0.000316987	463.503	0.000450046	461.898	0.00054208		462.224	0.000575187	0.000186068	0.323492
		57	470.503	0.000600402	470.386	0.000550561	469.457	0.000982428	470.726	0.000553063	469.759	0.000462263	470.305	0.000495232	469.481	0.000696747	470.6	0.00073725	470.561	0.000288822	470.303	0.000661533	470.64	0.000305244	471.572	0.000470005	469.982	0.00052718		470.329	0.000563902	0.000182986	0.324499
		58	478.637	0.000642048	478.532	0.000514649	477.651	0.000958991	478.801	0.000534454	477.889	0.000452246	478.431	0.00050617	477.592	0.000691082	478.801	0.000671199	478.741	0.000288794	478.403	0.000626335	478.724	0.000283522	479.65	0.00045924	478.132	0.000516151		478.46	0.000549606	0.000177425	0.322822
		59	486.787	0.000569125	486.618	0.000540414	485.827	0.00097072	486.876	0.000521521	485.987	0.000464583	486.561	0.00047836	485.754	0.000660567	486.935	0.0007396	486.991	0.000380116	486.454	0.000649967	486.816	0.000298639	487.762	0.000443706	486.305	0.000518494		486.59	0.000556601	0.000171425	0.307985
		60	494.907	0.000553932	494.675	0.000525958	493.955	0.000880137	495.036	0.00047709	494.139	0.000440003	494.654	0.00046904	493.908	0.00064005	495.095	0.000723483	495.108	0.000214785	494.628	0.000692083	494.876	0.000292432	495.899	0.000417822	494.379	0.000554695		494.712	0.000529347	0.00017856	0.337322
		61	503.044	0.000529769	502.762	0.000461857	502.171	0.000887997	503.197	0.000507613	502.238	0.000429532	502.712	0.000507566	501.96	0.000686204	503.158	0.00070645	503.201	0.000243349	502.705	0.000675587	503.04	0.000308272	504.068	0.00044683	502.464	0.000561283		502.825	0.000534793	0.0001731	0.323676
		62	511.201	0.00056492	510.856	0.000549392	510.345	0.000890979	511.273	0.000498822	510.364	0.000434456	510.813	0.00046163	510.039	0.000643762	511.274	0.000705935	511.284	0.000239535	510.884	0.000727213	511.139	0.000284651	512.14	0.000422099	510.519	0.000532717		510.933	0.000535085	0.000179198	0.334897
		63	519.262	0.000546678	519.01	0.000451218	518.427	0.000819767	519.352	0.000497603	518.481	0.000431191	518.891	0.000413231	518.234	0.00068254	519.425	0.00068925	519.429	0.000324469	518.947	0.000654134	519.274	0.000250767	520.227	0.000418844	518.693	0.000492758		519.05	0.000513265	0.000160534	0.312769
		64	527.46	0.000588046	527.081	0.000531021	526.51	0.000826447	527.454	0.000469808	526.618	0.000401827	527.071	0.000433936	526.376	0.000661085	527.558	0.000643792	527.585	0.000209943	527.03	0.000681095	527.429	0.000287898	528.284	0.000393491	526.849	0.000555648		527.177	0.000514157	0.000170922	0.332432
		65	535.592	0.000591915	535.17	0.000585566	534.593	0.00083708	535.599	0.000485744	534.791	0.000406014	535.198	0.00044725	534.576	0.000641556	535.64	0.000682008	535.681	0.000260197	535.111	0.000669209	535.573	0.00027294	536.388	0.000390462	535.001	0.00050543		535.301	0.000521182	0.000167895	0.322143
		66	543.668	0.000560746	543.241	0.000486218	542.685	0.000817812	543.679	0.000502467	542.958	0.000408429	543.273	0.000434292	542.677	0.000622794	543.716	0.00065215	543.842	0.00031382	543.262	0.000651241	543.72	0.000267458	544.47	0.000399476	543.092	0.000480105		543.406	0.000507462	0.00015199	0.29951
		67	551.761	0.000525878	551.325	0.000505835	550.851	0.00080705	551.769	0.000448915	551.106	0.000382377	551.366	0.000444426	550.772	0.000635986	551.877	0.000705339	551.923	0.00025864	551.435	0.000684293	551.86	0.000244382	552.544	0.000375197	551.175	0.000505761		551.52	0.000501852	0.000170366	0.339475
		68	559.936	0.000556305	559.476	0.000510576	559.008	0.000800266	559.917	0.00047085	559.161	0.0003894	559.532	0.00040596	558.849	0.000557812	559.994	0.000656729	560.017	0.000240095	559.493	0.000735246	559.989	0.000273601	560.653	0.000378363	559.325	0.000478384		559.642	0.00049643	0.000166463	0.33532
		69	567.997	0.000475935	567.574	0.000531954	567.157	0.000773052	567.989	0.000474194	567.253	0.000369455	567.682	0.00044414	566.939	0.000600802	568.14	0.00071482	568.153	0.000235432	567.68	0.00071958	568.163	0.000244442	568.888	0.000365564	567.417	0.000473878		567.772	0.000494096	0.000172027	0.348164
		70	576.166	0.000518187	575.749	0.000490114	575.325	0.000775207	576.085	0.000457752	575.333	0.0003717	575.815	0.000398319	575.071	0.00059555	576.224	0.000664934	576.262	0.000263203	575.762	0.000645902	576.317	0.000293465	576.998	0.000386991	575.497	0.000497202		575.893	0.000489117	0.000150649	0.308002
		71	584.245	0.000473598	583.888	0.000415763	583.48	0.000775888	584.168	0.000441081	583.433	0.000376285	583.918	0.000388268	583.27	0.000584874	584.293	0.000655972	584.386	0.000344858	583.908	0.0006766	584.386	0.000286005	585.177	0.000361429	583.585	0.000478369		584.011	0.000481461	0.000148029	0.307458
		72	592.403	0.000512626	592.042	0.000500131	591.617	0.000751104	592.311	0.000452516	591.576	0.000385506	591.993	0.000382965	591.408	0.000562125	592.444	0.000606903	592.481	0.000197921	591.983	0.000587539	592.548	0.000266369	593.254	0.00036101	591.67	0.000501683		592.133	0.0004668	0.000148899	0.318978
		73	600.489	0.000500573	600.232	0.000431593	599.728	0.000763883	600.411	0.000448228	599.665	0.000385957	600.089	0.00038315	599.492	0.000619006	600.552	0.000631519	600.639	0.000290379	600.152	0.000639664	600.663	0.000278287	601.427	0.000344071	599.793	0.000535323		600.256	0.000480895	0.000149592	0.311071
		74	608.638	0.000511766	608.468	0.000502497	607.857	0.000721152	608.664	0.000427601	607.816	0.000380355	608.171	0.000383879	607.556	0.000499478	608.622	0.000657201	608.787	0.000415105	608.322	0.000583414	608.817	0.000268757	609.482	0.000365803	607.885	0.000461464		608.391	0.000475267	0.000124494	0.261946
		75	616.817	0.000529465	616.591	0.000565151	616.044	0.000714618	616.907	0.000447437	615.915	0.000376481	616.305	0.000419391	615.669	0.00052158	616.714	0.000670934	616.867	0.000458863	616.401	0.000675297	616.953	0.000243658	617.614	0.000363854	615.972	0.000511663		616.521	0.000499876	0.00013607	0.272207

## Sheet: Figure 2
			x	-0.04	0.03
			y	-0.04	0.03
				DRV
	ECH	n°part	analysis duration in s	Time dependent H correction	Static H-correction
	NBL126	Part 14	152	0.00450874	0.0113803
	NBL126	Part 8	182.4	0.00594872	0.0115294
	NBL126	Part 6	182.4	0.00103607	0.00836312
	NBL126	Part 5	182.4	0.00698812	0.0141703
	NBL126	Part 13	212.8	-0.00100481	0.00451817
	CMX6	Part 19	212.8	-0.0302894	-0.0240838
	CMX6	Part 25	258.4	-0.00342206	0.00210714
	CMX6	Part 18	258.4	0.00457523	0.0104266
	CMX6	Part 13	288.8	-0.00026539	0.00511789
	CMX6	Part 24	319.2	-0.00102055	0.00292676
	CMX6	Part 16	334.4	0.00102068	0.00472718
	MP2	Part 19	334.4	-0.00262291	0.00630033
	NBL126	Part 15	349.6	0.00780461	0.0102053
	CMX6	Part 22	349.6	-0.0203586	-0.0179376
	MP2	Part 11	349.6	0.0086005	0.0184244
	NBL126	Part 16	349.6	0.00119424	0.00203333
	MP2	Part 4	380	0.0149131	0.0245146
	CMX6	Part 20	395.2	-0.00498324	-0.00221467
	NBL126	Part 3	395.2	0.000332301	-3.99912e-05
	CMX6	Part 23	410.4	-0.00570765	-0.00316781
	CMX6	Part 17	410.4	-0.000443345	0.00142275
	CMX6	Part 21	425.6	-0.00141554	0.000660916
	NBL126	Part 23	440.8	-0.000916477	-0.00145912
	NBL126	Part 20	456	0.00271813	0.00210604
	MP2	Part 21	456	-0.00683657	-0.00345151
	NBL126	Part 21	486.4	0.00364449	0.00207858
	NBL126	Part 12	501.6	0.00307071	0.00228053
	MP2	Part 14	501.6	-0.00530514	-0.00248188
	NBL126	Part 11	516.8	0.00231297	0.000470706
	MP2	Part 22	516.8	-0.0135081	-0.0110087
	CMX6	Part 14	532	0.000685075	0.000856929
	CMX6	Part 8	547.2	-0.00149825	-0.00145511
	NBL126	Part 18	577.6	0.012266	0.0108208
	CMX6	Part 1	577.6	0.000831554	0.00527898
	NBL126	Part 17	577.6	0.00459145	0.00190903
	NBL126	Part 9	577.6	-0.0075071	-0.0106421
	NBL126	Part 22	577.6	0.00336746	0.000684974
	CMX6	Part 12	577.6	0.00361923	0.00365781
	CMX6	Part 11	577.6	-0.00269876	-0.00250764
	NBL126	Part 19	577.6	0.00235911	4.25703e-05
	MP2	Part 18	577.6	-0.0116503	-0.0118152
	CMX6	Part 10	577.6	-0.00266417	-0.00299129
	CMX6	Part 7	577.6	0.00574585	0.00546519
	MP2	Part 20	577.6	-0.0109562	-0.0111412
	NBL126	Part 7	577.6	0.00477346	0.00150144
	CMX6	Part 5	577.6	0.00518876	0.00509837
	MP2	Part 13	577.6	-0.0114068	-0.0121466
	NBL126	Part 10	577.6	-0.00236953	-0.00554255
	MP2	Part 12	577.6	0.00500919	0.00421562
	MP2	Part 9	577.6	0.0172125	0.0153622
	CMX6	Part 4	577.6	-0.0207393	-0.0207598
	MP2	Part 8	577.6	0.000739491	0.00126311
	MP2	Part 16	577.6	-0.00166171	-0.00136534
	MP2	Part 10	577.6	-0.00503038	-0.0050002
	MP2	Part 3	577.6	-0.00109743	-0.000328385
	NBL126	Part 2	577.6	0.00991937	0.00759508
	MP2	Part 17	577.6	2.68608e-05	-0.000272513
	MP2	Part 7	577.6	0.00355595	0.00400515
	MP2	Part 5	577.6	-0.000719653	-0.000583178
	MP2	Part 2	577.6	0.00409309	0.00512901
	MP2	Part 15	577.6	0.0168053	0.0181568
	MP2	Part 6	577.6	0.00628918	0.00717031
	MP2	Part 1	577.6	-0.00252462	-0.00407444

## Sheet: Figure 4a
		Corrected data (k=2)
	Date analyse	240Pu/239Pu	IC*	IC%	ref value	ref+2s	ref-2s
1	2023-03-06	0.0224056	0.000560022	0.0124974	0.0224025	0.0224076	0.0223975
2	2023-03-06	0.0225542	0.000556279	0.012332	0.0224025	0.0224076	0.0223975
3	2023-03-06	0.0224376	0.000556217	0.0123947	0.0224025	0.0224076	0.0223975
4	2023-03-06	0.0227973	0.000562097	0.0123282	0.0224025	0.0224076	0.0223975
5	2023-03-06	0.0224461	0.000557298	0.0124141	0.0224025	0.0224076	0.0223975
6	2023-03-06	0.0226036	0.000556435	0.0123086	0.0224025	0.0224076	0.0223975
7	2023-03-06	0.0225422	0.000558298	0.0123834	0.0224025	0.0224076	0.0223975
8	2023-03-06	0.0224789	0.000557078	0.0123911	0.0224025	0.0224076	0.0223975
9	2023-03-06	0.0228489	0.000565585	0.0123766	0.0224025	0.0224076	0.0223975
10	2023-03-06	0.0223493	0.000559527	0.0125178	0.0224025	0.0224076	0.0223975
11	2023-03-06	0.0226555	0.000593034	0.0130881	0.0224025	0.0224076	0.0223975
12	2023-03-06	0.0225748	0.000559168	0.0123848	0.0224025	0.0224076	0.0223975
13	2023-03-06	0.0222061	0.000557221	0.0125466	0.0224025	0.0224076	0.0223975
14	2023-03-06	0.0223431	0.000560214	0.0125366	0.0224025	0.0224076	0.0223975
15	2023-03-06	0.0228398	0.000556592	0.0121847	0.0224025	0.0224076	0.0223975
16	2023-03-06	0.022425	0.000555964	0.0123961	0.0224025	0.0224076	0.0223975
17	2023-03-06	0.0224629	0.000555924	0.0123743	0.0224025	0.0224076	0.0223975
18	2023-03-06	0.0222006	0.000558061	0.0125686	0.0224025	0.0224076	0.0223975
19	2023-03-06	0.0224034	0.000576276	0.0128614	0.0224025	0.0224076	0.0223975
20	2023-03-06	0.0222162	0.000559071	0.0125825	0.0224025	0.0224076	0.0223975
21	2023-03-06	0.0223087	0.00056622	0.0126906	0.0224025	0.0224076	0.0223975
22	2023-03-06	0.0221589	0.000556903	0.0125661	0.0224025	0.0224076	0.0223975
23	2023-03-06	0.0225087	0.000583181	0.0129546	0.0224025	0.0224076	0.0223975
24	2023-03-06	0.0222093	0.00060892	0.0137087	0.0224025	0.0224076	0.0223975

## Sheet: Figure 4b
		Rapports Isotopiques U corrigés du gain (k=1)									Rapports Isotopiques Pu corrigés du gain (k=1)									Corrected data (k=2)
	Date analyse	234U/238U	IC*	IC%	235U/238U	IC*	IC%	236U/238U	IC*	IC%	240Pu/239Pu	IC*	IC%	241Pu/239Pu	IC*	IC%	239Pu/238U	IC*	IC%	240Pu/239Pu	IC*	IC%	reference value	ref+2s	ref-2s
1	2024-05-28																			0.063265	0.00052087	0.00411657	0.0626436	0.0626596	0.0626277
2	2024-05-28																			0.0626645	0.000536814	0.00428324	0.0626436	0.0626596	0.0626277
3	2024-05-28																			0.0630814	0.00060552	0.00479951	0.0626436	0.0626596	0.0626277
4	2024-05-28																			0.0627085	0.000773497	0.0061674	0.0626436	0.0626596	0.0626277
5	2024-05-28																			0.0629427	0.000527209	0.00418801	0.0626436	0.0626596	0.0626277
6	2024-05-28																			0.0630163	0.000778373	0.00617597	0.0626436	0.0626596	0.0626277
7	2024-05-28																			0.0621734	0.000548085	0.00440771	0.0626436	0.0626596	0.0626277
8	2024-05-28																			0.0624952	0.00052853	0.00422856	0.0626436	0.0626596	0.0626277
9	2024-05-28																			0.0627885	0.000527069	0.00419717	0.0626436	0.0626596	0.0626277
10	2024-05-28																			0.062836	0.000569178	0.00452908	0.0626436	0.0626596	0.0626277
11	2024-05-28																			0.0625807	0.000647812	0.00517582	0.0626436	0.0626596	0.0626277
12	2024-05-28																			0.0629261	0.000981915	0.00780213	0.0626436	0.0626596	0.0626277
13	2024-05-28																			0.0631325	0.000675244	0.00534783	0.0626436	0.0626596	0.0626277
14	2024-05-28																			0.0627185	0.000558267	0.00445058	0.0626436	0.0626596	0.0626277
15	2024-05-28																			0.0629313	0.000545819	0.00433663	0.0626436	0.0626596	0.0626277
16	2024-05-28																			0.063412	0.000558121	0.00440075	0.0626436	0.0626596	0.0626277
17	2024-05-28																			0.0627914	0.00052396	0.00417223	0.0626436	0.0626596	0.0626277
18	2024-05-28																			0.0628139	0.000533709	0.00424834	0.0626436	0.0626596	0.0626277
19	2024-05-28																			0.0628719	0.000544384	0.00432931	0.0626436	0.0626596	0.0626277
20	2024-05-28																			0.0628546	0.00052751	0.00419627	0.0626436	0.0626596	0.0626277
21	2024-05-28																			0.0625862	0.000560999	0.00448181	0.0626436	0.0626596	0.0626277

## Sheet: Figure 4c
		Corrected data (k=2)
	Date analyse	240Pu/239Pu	IC*	IC%	Reference value	ref+2sd	ref-2sd
1	2024-03-19	0.0616667	0.000794614	0.00644281	0.0616154	0.0630938	0.060137
2	2024-03-19	0.0603376	0.000774056	0.00641438	0.0616154	0.0630938	0.060137
3	2024-03-19	0.0619351	0.00077834	0.00628351	0.0616154	0.0630938	0.060137
4	2024-03-19	0.0619694	0.000780567	0.006298	0.0616154	0.0630938	0.060137
5	2024-03-19	0.0615231	0.000779709	0.00633672	0.0616154	0.0630938	0.060137
6	2024-03-19	0.0614513	0.000777425	0.00632554	0.0616154	0.0630938	0.060137
7	2024-03-19	0.0614491	0.000778543	0.00633486	0.0616154	0.0630938	0.060137
8	2024-03-19	0.0618384	0.000779574	0.00630332	0.0616154	0.0630938	0.060137
9	2024-03-19	0.0615991	0.000823629	0.0066854	0.0616154	0.0630938	0.060137
10	2024-03-19	0.0616576	0.000783853	0.00635649	0.0616154	0.0630938	0.060137
11	2024-03-19	0.0616783	0.000791088	0.00641301	0.0616154	0.0630938	0.060137
12	2024-03-19	0.0615881	0.000794769	0.00645229	0.0616154	0.0630938	0.060137
13	2024-03-19	0.0618973	0.000827695	0.00668604	0.0616154	0.0630938	0.060137
14	2024-03-19	0.0597491	0.000906698	0.00758754	0.0616154	0.0630938	0.060137
15	2024-03-19	0.0613084	0.000795547	0.00648808	0.0616154	0.0630938	0.060137
16	2024-03-19	0.0615282	0.000791469	0.00643176	0.0616154	0.0630938	0.060137
17	2024-03-19	0.060361	0.000807366	0.00668781	0.0616154	0.0630938	0.060137
18	2024-03-19	0.0612637	0.0007881	0.00643203	0.0616154	0.0630938	0.060137
19	2024-03-19	0.0615525	0.000792499	0.00643759	0.0616154	0.0630938	0.060137
20	2024-03-19	0.0614046	0.000814637	0.00663336	0.0616154	0.0630938	0.060137

## Sheet: Figures 5 and 6
	Corrected data (k=2)									Corrected data (k=2)
MOXUK-100	234U/238U	IC*	IC%	235U/238U	IC*	IC%	236U/238U	IC*	IC%	240Pu/239Pu	IC*	IC%	239Pu/238U	IC*	IC%	RI 234U ref	RI 234U+2s	RI234U-2s	RI 235U ref	RI 235U+2s	RI235U-2s	RI 236U ref	RI 236U+2s	RI236U-2s	RIPu ref	RIPu +2s	RIPu -2s	239Pu/238U	239Pu/238U-2s	239Pu/238U -2s
1	0.000178193	4.97172e-06	0.0279007	0.0158647	0.000104028	0.00655721	0.000563278	1.75578e-05	0.0311708	0.288472	0.00700683	0.0242894	0.00831318	0.00122313	0.147132	0.000177387	0.00017815	0.00017815	0.0158914	0.0158936	0.0158893	0.000562534	0.000563823	0.000561246	0.286207	0.2863	0.286115	0.00647146	0.0071186	0.00582431
2	0.000183402	1.31992e-05	0.0719684	0.015982	0.000168814	0.0105628	0.000562703	2.46813e-05	0.043862	0.291433	0.0139847	0.0479861	0.00492581	0.000751266	0.152516	0.000177387	0.00017815	0.00017815	0.0158914	0.0158936	0.0158893	0.000562534	0.000563823	0.000561246	0.286207	0.2863	0.286115	0.00647146	0.0071186	0.00582431
3	0.000178859	3.5929e-06	0.0200879	0.0158843	9.9532e-05	0.00626605	0.000573151	1.69524e-05	0.0295776	0.27993	0.00656041	0.0234359	0.00868535	0.00127037	0.146265	0.000177387	0.00017815	0.00017815	0.0158914	0.0158936	0.0158893	0.000562534	0.000563823	0.000561246	0.286207	0.2863	0.286115	0.00647146	0.0071186	0.00582431
4	0.000175972	7.16978e-06	0.0407438	0.0158863	0.000149455	0.00940776	0.000570766	2.96156e-05	0.0518874	0.282757	0.00595161	0.0210485	0.0107812	0.00148213	0.137474	0.000177387	0.00017815	0.00017815	0.0158914	0.0158936	0.0158893	0.000562534	0.000563823	0.000561246	0.286207	0.2863	0.286115	0.00647146	0.0071186	0.00582431
5	0.000180924	3.39109e-06	0.0187432	0.0159131	0.000101387	0.00637128	0.000568143	1.71745e-05	0.0302292	0.287518	0.00838347	0.0291581	0.00713566	0.0010783	0.151114	0.000177387	0.00017815	0.00017815	0.0158914	0.0158936	0.0158893	0.000562534	0.000563823	0.000561246	0.286207	0.2863	0.286115	0.00647146	0.0071186	0.00582431
6	0.00017886	3.18327e-05	0.177976	0.016056	0.000290919	0.0181191	0.000544274	9.1383e-05	0.167899	0.291343	0.0416076	0.142813	0.00337984	0.000770704	0.22803	0.000177387	0.00017815	0.00017815	0.0158914	0.0158936	0.0158893	0.000562534	0.000563823	0.000561246	0.286207	0.2863	0.286115	0.00647146	0.0071186	0.00582431
7	0.000165181	9.8679e-06	0.0597401	0.0160041	0.000143927	0.00899314	0.000550474	1.82192e-05	0.0330973	0.289313	0.0103535	0.0357864	0.00617601	0.000847573	0.137236	0.000177387	0.00017815	0.00017815	0.0158914	0.0158936	0.0158893	0.000562534	0.000563823	0.000561246	0.286207	0.2863	0.286115	0.00647146	0.0071186	0.00582431
8	0.000178245	5.08758e-06	0.0285426	0.0158347	9.903e-05	0.00625397	0.000553771	1.647e-05	0.0297416	0.293949	0.0147956	0.0503339	0.00437685	0.000897982	0.205166	0.000177387	0.00017815	0.00017815	0.0158914	0.0158936	0.0158893	0.000562534	0.000563823	0.000561246	0.286207	0.2863	0.286115	0.00647146	0.0071186	0.00582431
9	0.000177997	3.69491e-06	0.0207583	0.0159155	9.37775e-05	0.00589222	0.000562972	1.6775e-05	0.0297973	0.282453	0.00808584	0.0286272	0.00690552	0.000951611	0.137804	0.000177387	0.00017815	0.00017815	0.0158914	0.0158936	0.0158893	0.000562534	0.000563823	0.000561246	0.286207	0.2863	0.286115	0.00647146	0.0071186	0.00582431
10	0.000175582	3.73499e-06	0.0212721	0.015886	9.62685e-05	0.00605996	0.000556929	1.66764e-05	0.0299435	0.303744	0.0207271	0.0682387	0.00298731	0.000450258	0.150724	0.000177387	0.00017815	0.00017815	0.0158914	0.0158936	0.0158893	0.000562534	0.000563823	0.000561246	0.286207	0.2863	0.286115	0.00647146	0.0071186	0.00582431
11	0.000177596	8.61371e-06	0.0485017	0.0159453	0.000108839	0.00682579	0.0005549	1.97565e-05	0.0356038	0.285654	0.00817487	0.0286181	0.00781298	0.00108321	0.138642	0.000177387	0.00017815	0.00017815	0.0158914	0.0158936	0.0158893	0.000562534	0.000563823	0.000561246	0.286207	0.2863	0.286115	0.00647146	0.0071186	0.00582431
12	0.000179007	9.63651e-06	0.0538331	0.015944	0.00012336	0.00773712	0.000543175	1.95819e-05	0.0360508	0.290065	0.0124916	0.0430647	0.00584994	0.00109668	0.187469	0.000177387	0.00017815	0.00017815	0.0158914	0.0158936	0.0158893	0.000562534	0.000563823	0.000561246	0.286207	0.2863	0.286115	0.00647146	0.0071186	0.00582431
13	0.000176747	3.74794e-06	0.0212052	0.0158434	9.70938e-05	0.00612835	0.000568352	1.78603e-05	0.0314248	0.2836	0.00821003	0.0289493	0.00703382	0.00100821	0.143338	0.000177387	0.00017815	0.00017815	0.0158914	0.0158936	0.0158893	0.000562534	0.000563823	0.000561246	0.286207	0.2863	0.286115	0.00647146	0.0071186	0.00582431
14	0.000172729	3.88706e-05	0.225038	0.0159645	0.00021092	0.0132118	0.000543858	5.67379e-05	0.104325	0.288014	0.0172249	0.059806	0.0081687	0.00171684	0.210173	0.000177387	0.00017815	0.00017815	0.0158914	0.0158936	0.0158893	0.000562534	0.000563823	0.000561246	0.286207	0.2863	0.286115	0.00647146	0.0071186	0.00582431
15	0.000161586	2.09671e-05	0.129758	0.0160711	0.000206931	0.012876	0.000565827	3.17458e-05	0.0561052	0.284746	0.00597756	0.0209926	0.0187409	0.00253715	0.13538	0.000177387	0.00017815	0.00017815	0.0158914	0.0158936	0.0158893	0.000562534	0.000563823	0.000561246	0.286207	0.2863	0.286115	0.00647146	0.0071186	0.00582431
MOKUK-050																RI 234U ref	RI 234U+2s	RI234U-2s	RI 235U ref	RI 235U+2s	RI235U-2s	RI 236U ref	RI 236U+2s	RI236U-2s	RIPu ref	RIPu +2s	RIPu -2s	RI239Pu/238U ref	RI+2s	RI-2s
17	0.000182445	3.23357e-06	0.0177235	0.0159466	9.78672e-05	0.0061372	0.000645627	1.87884e-05	0.0291011	0.269825	0.00450225	0.0166858	0.0237878	0.00318062	0.133708	0.000184142	0.000184872	0.000184872	0.0159075	0.0159106	0.0159044	0.000577625	0.000581123	0.000574127	0.286135	0.28621	0.286135	0.0150762	0.0165838	0.0135686
18	0.000184843	3.02213e-06	0.0163497	0.0159472	9.57639e-05	0.00600507	0.00058143	1.23997e-05	0.0213263	0.284329	0.00361963	0.0127304	0.0204469	0.00276208	0.135085	0.000184142	0.000184872	0.000184872	0.0159075	0.0159106	0.0159044	0.000577625	0.000581123	0.000574127	0.286135	0.28621	0.286135	0.0150762	0.0165838	0.0135686
19	0.000182084	2.77238e-06	0.0152258	0.0159608	9.58498e-05	0.00600531	0.000595551	1.33537e-05	0.0224224	0.277469	0.00452615	0.0163123	0.0170239	0.00227401	0.133577	0.000184142	0.000184872	0.000184872	0.0159075	0.0159106	0.0159044	0.000577625	0.000581123	0.000574127	0.286135	0.28621	0.286135	0.0150762	0.0165838	0.0135686
20	0.000183173	3.57458e-06	0.0195148	0.0159362	9.38933e-05	0.00589184	0.00058143	1.26693e-05	0.0217899	0.286058	0.00379691	0.0132732	0.0199053	0.0026518	0.133221	0.000184142	0.000184872	0.000184872	0.0159075	0.0159106	0.0159044	0.000577625	0.000581123	0.000574127	0.286135	0.28621	0.286135	0.0150762	0.0165838	0.0135686
21	0.00018016	6.27501e-06	0.0348303	0.0159415	0.000103869	0.00651566	0.000591213	1.53776e-05	0.0260103	0.27788	0.0064068	0.023056	0.0122312	0.00168266	0.137571	0.000184142	0.000184872	0.000184872	0.0159075	0.0159106	0.0159044	0.000577625	0.000581123	0.000574127	0.286135	0.28621	0.286135	0.0150762	0.0165838	0.0135686
22	0.000182562	3.91821e-06	0.0214624	0.0159289	9.44593e-05	0.00593005	0.000583715	1.36842e-05	0.0234432	0.282815	0.00362919	0.0128324	0.0205141	0.00277379	0.135214	0.000184142	0.000184872	0.000184872	0.0159075	0.0159106	0.0159044	0.000577625	0.000581123	0.000574127	0.286135	0.28621	0.286135	0.0150762	0.0165838	0.0135686
23	0.000180823	6.11489e-06	0.0338169	0.0159062	9.9592e-05	0.00626121	0.000586418	1.29218e-05	0.0220352	0.286463	0.00355035	0.0123938	0.0233948	0.00320236	0.136883	0.000184142	0.000184872	0.000184872	0.0159075	0.0159106	0.0159044	0.000577625	0.000581123	0.000574127	0.286135	0.28621	0.286135	0.0150762	0.0165838	0.0135686
24	0.000181994	6.66705e-06	0.0366332	0.015948	0.000102858	0.00644958	0.000576549	1.4478e-05	0.0251114	0.281206	0.0066365	0.0236002	0.0110218	0.00156537	0.142026	0.000184142	0.000184872	0.000184872	0.0159075	0.0159106	0.0159044	0.000577625	0.000581123	0.000574127	0.286135	0.28621	0.286135	0.0150762	0.0165838	0.0135686
25	0.000181121	4.76011e-06	0.0262814	0.015897	0.000102957	0.00647653	0.00058218	1.31158e-05	0.0225288	0.284152	0.00440712	0.0155098	0.0167337	0.00225478	0.134745	0.000184142	0.000184872	0.000184872	0.0159075	0.0159106	0.0159044	0.000577625	0.000581123	0.000574127	0.286135	0.28621	0.286135	0.0150762	0.0165838	0.0135686
26	0.000189341	4.53996e-06	0.0239777	0.0159209	9.8547e-05	0.00618978	0.000759561	1.59761e-05	0.0210334	0.228222	0.00299623	0.0131286	0.0206961	0.00275377	0.133057	0.000184142	0.000184872	0.000184872	0.0159075	0.0159106	0.0159044	0.000577625	0.000581123	0.000574127	0.286135	0.28621	0.286135	0.0150762	0.0165838	0.0135686
27	0.000180837	4.96176e-06	0.0274377	0.0158967	9.97952e-05	0.00627771	0.000579762	1.32811e-05	0.0229079	0.281099	0.00513863	0.0182805	0.0135117	0.00180975	0.133939	0.000184142	0.000184872	0.000184872	0.0159075	0.0159106	0.0159044	0.000577625	0.000581123	0.000574127	0.286135	0.28621	0.286135	0.0150762	0.0165838	0.0135686
28	0.000183783	5.09104e-06	0.0277013	0.0159238	9.96462e-05	0.0062577	0.000615349	1.42636e-05	0.0231798	0.283716	0.00268958	0.00947983	0.0422002	0.00567652	0.134514	0.000184142	0.000184872	0.000184872	0.0159075	0.0159106	0.0159044	0.000577625	0.000581123	0.000574127	0.286135	0.28621	0.286135	0.0150762	0.0165838	0.0135686
29	0.000179482	9.466e-06	0.0527408	0.0159782	0.000122996	0.00769773	0.000583104	2.09205e-05	0.0358779	0.277675	0.00531797	0.0191518	0.018285	0.00248085	0.135677	0.000184142	0.000184872	0.000184872	0.0159075	0.0159106	0.0159044	0.000577625	0.000581123	0.000574127	0.286135	0.28621	0.286135	0.0150762	0.0165838	0.0135686
30	0.000186811	5.56876e-06	0.0298095	0.0159124	0.000102416	0.00643623	0.000594521	1.57364e-05	0.026469	0.277924	0.00497998	0.0179185	0.0156076	0.00213966	0.137091	0.000184142	0.000184872	0.000184872	0.0159075	0.0159106	0.0159044	0.000577625	0.000581123	0.000574127	0.286135	0.28621	0.286135	0.0150762	0.0165838	0.0135686
31	0.000186754	6.36732e-06	0.0340947	0.0157545	0.000101102	0.00641735	0.000582423	1.45229e-05	0.0249353	0.280648	0.00669535	0.0238568	0.0130974	0.00186825	0.142643	0.000184142	0.000184872	0.000184872	0.0159075	0.0159106	0.0159044	0.000577625	0.000581123	0.000574127	0.286135	0.28621	0.286135	0.0150762	0.0165838	0.0135686
MOXUK-010																									RIPu ref	RIPu +2s	RIPu -2s
33	0.00023423	2.89607e-05	0.123642	0.0163842	0.0002195	0.013397	0.000638545	7.05238e-05	0.110445	0.273487	0.00588737	0.021527	0.0970807	0.0176603	0.181914	0.00022352	0.000224394	0.000224394	0.0160024	0.0160079	0.015997	0.000674613	0.000692139	0.000657088	0.286058	0.286165	0.285951	0.0808568	0.0889424	0.0727711
34	0.000221042	1.06508e-05	0.0481846	0.0160582	0.000103736	0.00646002	0.000692348	2.30564e-05	0.0333017	0.286013	0.00201608	0.0070489	0.071375	0.00975031	0.136607	0.00022352	0.000224394	0.000224394	0.0160024	0.0160079	0.015997	0.000674613	0.000692139	0.000657088	0.286058	0.286165	0.285951	0.0808568	0.0889424	0.0727711
35	0.000233832	1.42209e-05	0.0608168	0.0159363	0.000127624	0.00800838	0.000691874	2.76194e-05	0.0399197	0.28564	0.00200603	0.00702291	0.110778	0.0179701	0.162218	0.00022352	0.000224394	0.000224394	0.0160024	0.0160079	0.015997	0.000674613	0.000692139	0.000657088	0.286058	0.286165	0.285951	0.0808568	0.0889424	0.0727711
36	0.000223112	1.7263e-05	0.0773738	0.0163814	0.000108149	0.00660192	0.000705841	3.22209e-05	0.045649	0.262159	0.00246624	0.00940741	0.092162	0.0126594	0.13736	0.00022352	0.000224394	0.000224394	0.0160024	0.0160079	0.015997	0.000674613	0.000692139	0.000657088	0.286058	0.286165	0.285951	0.0808568	0.0889424	0.0727711
37	0.000192019	2.25216e-05	0.117289	0.0159458	0.000176387	0.0110617	0.000650721	3.82104e-05	0.0587201	0.28582	0.00299679	0.0104849	0.122469	0.0212167	0.173241	0.00022352	0.000224394	0.000224394	0.0160024	0.0160079	0.015997	0.000674613	0.000692139	0.000657088	0.286058	0.286165	0.285951	0.0808568	0.0889424	0.0727711
38	0.000210651	1.11707e-05	0.0530296	0.0157167	0.000141719	0.00901713	0.000656771	3.54932e-05	0.054042	0.286421	0.00379565	0.013252	0.0551414	0.00793574	0.143916	0.00022352	0.000224394	0.000224394	0.0160024	0.0160079	0.015997	0.000674613	0.000692139	0.000657088	0.286058	0.286165	0.285951	0.0808568	0.0889424	0.0727711
39	0.000218662	2.56889e-05	0.117482	0.0159338	0.000234914	0.0147432	0.000685797	4.50567e-05	0.0656997	0.285844	0.00343825	0.0120284	0.123684	0.0174422	0.141022	0.00022352	0.000224394	0.000224394	0.0160024	0.0160079	0.015997	0.000674613	0.000692139	0.000657088	0.286058	0.286165	0.285951	0.0808568	0.0889424	0.0727711
40	0.000202649	2.24126e-05	0.110598	0.0161836	0.000216212	0.01336	0.000723769	4.66449e-05	0.0644472	0.279432	0.00432848	0.0154903	0.0571306	0.00760704	0.133152	0.00022352	0.000224394	0.000224394	0.0160024	0.0160079	0.015997	0.000674613	0.000692139	0.000657088	0.286058	0.286165	0.285951	0.0808568	0.0889424	0.0727711
41	0.000215731	3.03979e-05	0.140907	0.0157634	0.000280089	0.0177683	0.000700641	3.48953e-05	0.0498048	0.286951	0.00520987	0.0181559	0.0682318	0.00905424	0.132698	0.00022352	0.000224394	0.000224394	0.0160024	0.0160079	0.015997	0.000674613	0.000692139	0.000657088	0.286058	0.286165	0.285951	0.0808568	0.0889424	0.0727711
42	0.00018692	9.32668e-06	0.0498967	0.0158098	0.000100615	0.0063641	0.000671485	3.01087e-05	0.0448391	0.284032	0.00194574	0.00685043	0.0648755	0.00951033	0.146594	0.00022352	0.000224394	0.000224394	0.0160024	0.0160079	0.015997	0.000674613	0.000692139	0.000657088	0.286058	0.286165	0.285951	0.0808568	0.0889424	0.0727711
43	0.000246254	1.91674e-05	0.0778359	0.0159327	0.000133555	0.0083825	0.000657698	3.57382e-05	0.0543384	0.285471	0.00235103	0.00823563	0.0834616	0.0113024	0.13542	0.00022352	0.000224394	0.000224394	0.0160024	0.0160079	0.015997	0.000674613	0.000692139	0.000657088	0.286058	0.286165	0.285951	0.0808568	0.0889424	0.0727711
44	0.000185775	1.33344e-05	0.0717774	0.0159477	0.000118288	0.00741727	0.000658495	2.24639e-05	0.034114	0.285919	0.00285337	0.00997966	0.0571868	0.00824259	0.144134	0.00022352	0.000224394	0.000224394	0.0160024	0.0160079	0.015997	0.000674613	0.000692139	0.000657088	0.286058	0.286165	0.285951	0.0808568	0.0889424	0.0727711
45	0.000210052	2.0775e-05	0.0989041	0.015775	0.000170323	0.010797	0.000768822	3.55761e-05	0.0462736	0.275334	0.00310306	0.0112702	0.0618167	0.00855119	0.138331	0.00022352	0.000224394	0.000224394	0.0160024	0.0160079	0.015997	0.000674613	0.000692139	0.000657088	0.286058	0.286165	0.285951	0.0808568	0.0889424	0.0727711
46	0.000208767	1.00849e-05	0.048307	0.0160112	9.77326e-05	0.00610401	0.000663065	1.86234e-05	0.0280869	0.285872	0.00153227	0.00535998	0.076584	0.0117011	0.152787	0.00022352	0.000224394	0.000224394	0.0160024	0.0160079	0.015997	0.000674613	0.000692139	0.000657088	0.286058	0.286165	0.285951	0.0808568	0.0889424	0.0727711
47	0.000230159	1.21325e-05	0.0527137	0.015945	9.68142e-05	0.00607176	0.000720531	2.89335e-05	0.0401558	0.286527	0.00190493	0.00664835	0.11594	0.0154661	0.133398	0.00022352	0.000224394	0.000224394	0.0160024	0.0160079	0.015997	0.000674613	0.000692139	0.000657088	0.286058	0.286165	0.285951	0.0808568	0.0889424	0.0727711
48	0.000209585	1.21288e-05	0.0578704	0.0159658	0.000121477	0.00760855	0.000672131	2.94764e-05	0.0438552	0.286635	0.00266164	0.00928583	0.0523764	0.00782296	0.14936	0.00022352	0.000224394	0.000224394	0.0160024	0.0160079	0.015997	0.000674613	0.000692139	0.000657088	0.286058	0.286165	0.285951	0.0808568	0.0889424	0.0727711
49	0.000231746	1.2499e-05	0.053934	0.0160235	0.000293534	0.018319	0.000652917	2.72493e-05	0.0417347	0.281297	0.00409047	0.0145415	0.0767206	0.0114778	0.149605	0.00022352	0.000224394	0.000224394	0.0160024	0.0160079	0.015997	0.000674613	0.000692139	0.000657088	0.286058	0.286165	0.285951	0.0808568	0.0889424	0.0727711
